# Supplementary material for: Structural basis of THC analog activity at the Cannabinoid 1 receptor
Source: Nat Commun. 2025 Jan 8;16:486. doi: 10.1038/s41467-024-55808-4 (PMC11711184; doi:10.1038/s41467-024-55808-4)
Supplement: Supplementary file 3 — Supplementary Data 1 [file 41467_2024_55808_MOESM3_ESM.xlsx]

## Sheet: BiasFactor2AGref
Ligand	Bias plot slope	mGi				Arrestin				Ligand bias
		Emax (%)*	pEC50#	Log (Emax/EC50)	ΔLog (Emax/EC50)	Emax (%)*	pEC50#	Log (Emax/EC50)	ΔLog (Emax/EC50)	ΔΔLog (Emax/EC50)	Bias factor	For
2AG (Ref)	0	100	6	6	0.0 (ref.)	100	5.28	5.28	0.0 (ref.)	0	1	-
HU210	0	66.5	8.62	8.44282	2.44282	40.2	8.1	7.70423	2.42423	0.0185956	1.04375	mGi
HU243	0	74.1	8.69	8.55982	2.55982	58.5	8.11	7.87716	2.59716	0.0373377	1.08978	Arrestin
CP55940	0	69	8.42	8.25885	2.25885	41.1	7.97	7.58384	2.30384	0.0449927	1.10916	Arrestin
AEA	0	57.9	6.35	6.11268	0.112679	30.5	5.85	5.3343	0.0542998	0.0583787	1.14388	mGi
THC	0	24	8.29	7.67021	1.67021	14.1	7.9	7.04922	1.76922	0.0990079	1.25605	Arrestin
AM841	0	61.1	8.47	8.25604	2.25604	39.3	8.08	7.67439	2.39439	0.138351	1.37515	Arrestin
Nabilone	0	75.8	7.86	7.73967	1.73967	58.8	7.11	6.87938	1.59938	0.140292	1.38131	mGi
AM11542	0	54.6	8.47	8.20719	2.20719	31.7	8.16	7.66106	2.38106	0.173867	1.49234	Arrestin
JWH133	0	23.7	5.94	5.31475	-0.685252	9.11	6.05	5.00952	-0.270482	0.41477	2.59878	Arrestin
Cannabinol	0	15	6.89	6.06609	0.0660913			#NUM!	#NUM!	#NUM!	#NUM!	#NUM!
L759633	0	21.5	6.38	5.71244	-0.287562			#NUM!	#NUM!	#NUM!	#NUM!	#NUM!
THCv	0	-13.3	6.7	#NUM!	#NUM!			#NUM!	#NUM!	#NUM!	#NUM!	#NUM!
Explanation
Grey scaling depicts the order in which columns are used in formula
Formula can be seen inside each cell
*Emax is often reported as percent, but is multiplied by 0.01 to be expressed as fractions when calculatingLog(Emax/EC50)
#EC50 is reported with different units or as pEC50, but is expressed as a scientific number (X*10^-Y) when calculatingLog(Emax/EC50)
Adaptation for ΔΔLog(𝜏/KA)
Emax/EC50 is replaced by Log(𝜏/KA)
Unless individual 𝜏 and KA values are known, the Emax and EC50 columns are replaced with a single 𝜏/KA column

## Sheet: BiasFactorTHCref
Ligand	Bias plot slope	mGi				Arrestin				Ligand bias
		Emax (%)*	pEC50#	Log (Emax/EC50)	ΔLog (Emax/EC50)	Emax (%)*	pEC50#	Log (Emax/EC50)	ΔLog (Emax/EC50)	ΔΔLog (Emax/EC50)	Bias factor	For
THC (Ref)	0	24	8.29	7.67021	0.0 (ref.)	14.1	7.9	7.04922	0.0 (ref.)	0	1	-
AM841	0	61.1	8.47	8.25604	0.58583	39.3	8.08	7.67439	0.625173	0.0393435	1.09482	Arrestin
CP55940	0	69	8.42	8.25885	0.588638	41.1	7.97	7.58384	0.534623	0.0540151	1.13244	mGi
HU243	0	74.1	8.69	8.55982	0.889607	58.5	8.11	7.87716	0.827937	0.0616702	1.15258	mGi
AM11542	0	54.6	8.47	8.20719	0.536981	31.7	8.16	7.66106	0.61184	0.0748587	1.18812	Arrestin
2AG	0	100	6	6	-1.67021	100	5.28	5.28	-1.76922	0.0990079	1.25605	mGi
HU210	0	66.5	8.62	8.44282	0.77261	40.2	8.1	7.70423	0.655007	0.117603	1.311	mGi
AEA	0	57.9	6.35	6.11268	-1.55753	30.5	5.85	5.3343	-1.71492	0.157387	1.43677	mGi
Nabilone	0	75.8	7.86	7.73967	0.069458	58.8	7.11	6.87938	-0.169842	0.2393	1.735	mGi
JWH133	0	23.7	5.94	5.31475	-2.35546	9.11	6.05	5.00952	-2.0397	0.315762	2.06901	Arrestin
Cannabinol	0	15	6.89	6.06609	-1.60412			#NUM!	#NUM!	#NUM!	#NUM!
L759633	0	21.5	6.38	5.71244	-1.95777			#NUM!	#NUM!	#NUM!	#NUM!
THCv	0	-13.3	6.7	#NUM!	#NUM!			#NUM!	#NUM!	#NUM!	#NUM!
Explanation
Grey scaling depicts the order in which columns are used in formula
Formula can be seen inside each cell
*Emax is often reported as percent, but is multiplied by 0.01 to be expressed as fractions when calculatingLog(Emax/EC50)
#EC50 is reported with different units or as pEC50, but is expressed as a scientific number (X*10^-Y) when calculatingLog(Emax/EC50)
Adaptation for ΔΔLog(𝜏/KA)
Emax/EC50 is replaced by Log(𝜏/KA)
Unless individual 𝜏 and KA values are known, the Emax and EC50 columns are replaced with a single 𝜏/KA column
